# Supplementary material for: Thermal imaging of the fetus: An empirical feasibility study
Source: PLOS journal article supplement (doi:10.1371/journal.pone.0226755), 2020-07-28
Supplement: S1 (10.1371/journal.pone.0226755.s001) [file journal.pone.0226755.s001]

## Demographic Information Questionnaire

---

PILOT STUDY TO INVESTIGATE THE USE OF THERMAL IMAGING FOR RESEARCH AND CLINICAL USE IN  
PREGNANCY

---

Protocol/Study number: \_\_\_\_\_ Participant identification number: \_\_\_\_\_

1. Gender: Female ☒ Male ☐

2. Age: \_\_\_\_\_(years) Would rather not say ☐

3. Height: \_\_\_\_\_(cm) Would rather not say ☐

4. Weight: \_\_\_\_\_(Kg) Would rather not say ☐

5. Can you please tell us how many weeks pregnant you are? \_\_\_\_\_(weeks)

6. Have you ever been pregnant before? Yes ☐ No ☐ Would rather not say ☐

7. Have you ever given birth before? Yes ☐ No ☐ Would rather not say ☐
